# Supplementary material
Source: MDPI journal article supplement (https://www.mdpi.com/2071-1050/14/9/5189)
Supplement: s1 [file s1]

## Supplementary Materials

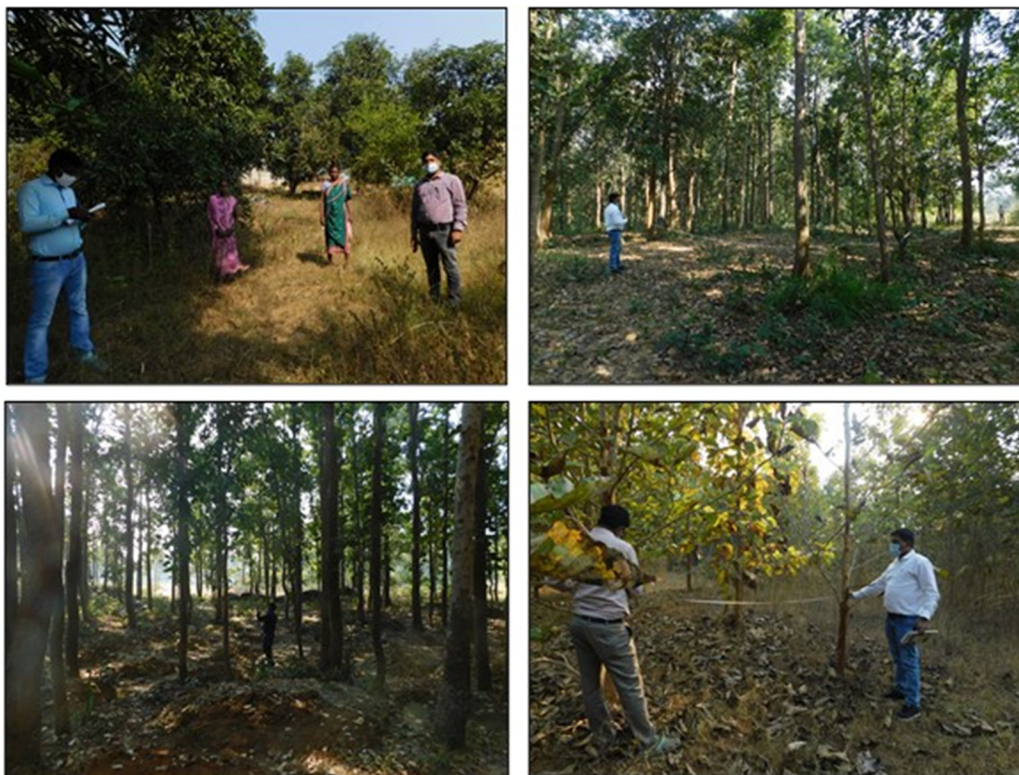

**Figure S1.** Field photographs of data collection.

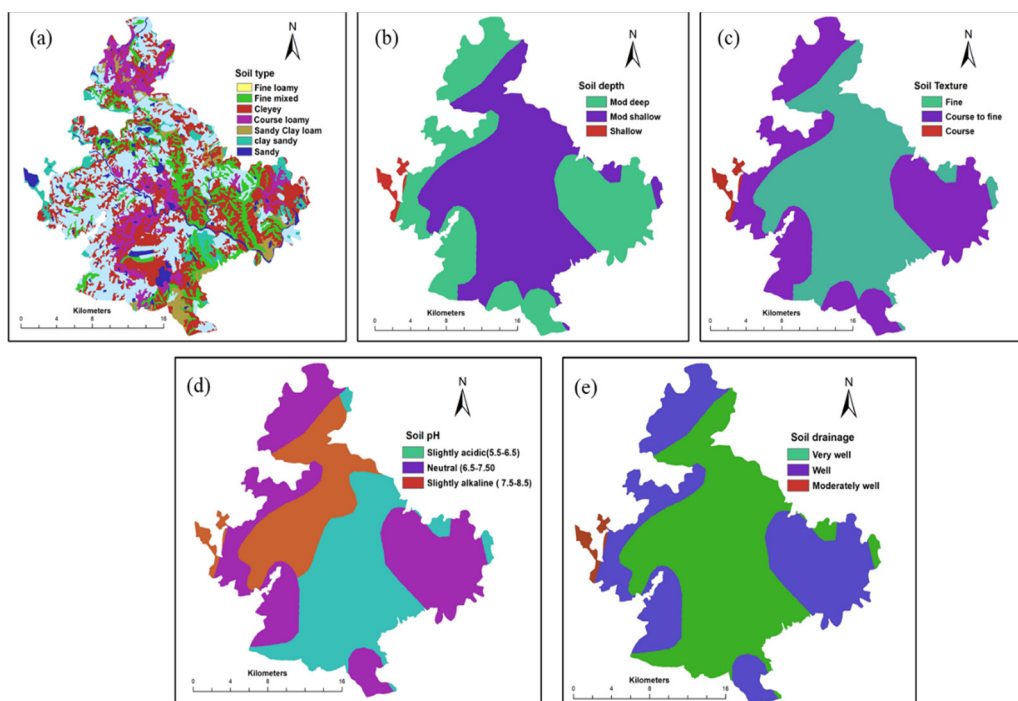

**Figure S2.** Soil characteristics: (a) type, (b) depth, (c) texture, (d) pH, (e) drainage.

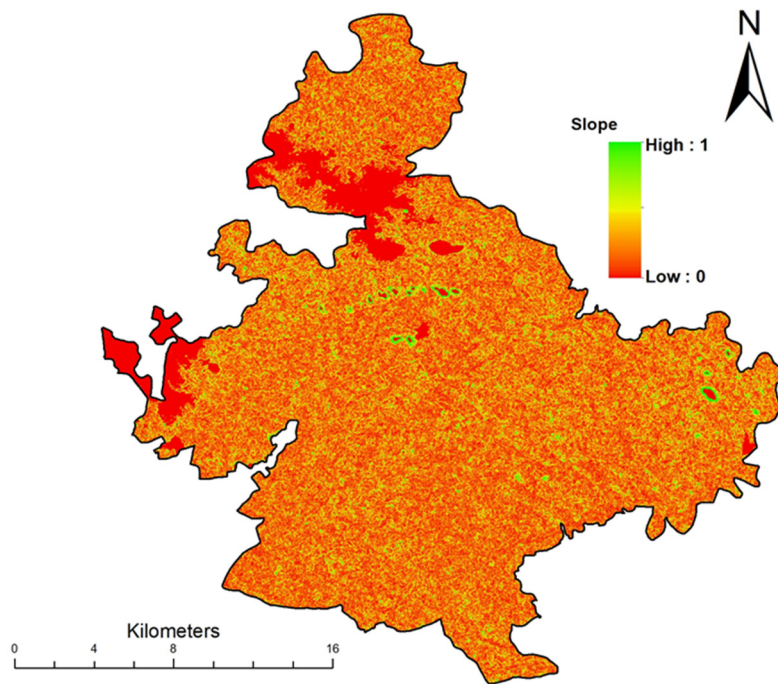

Figure S3. Slope map of the study area.

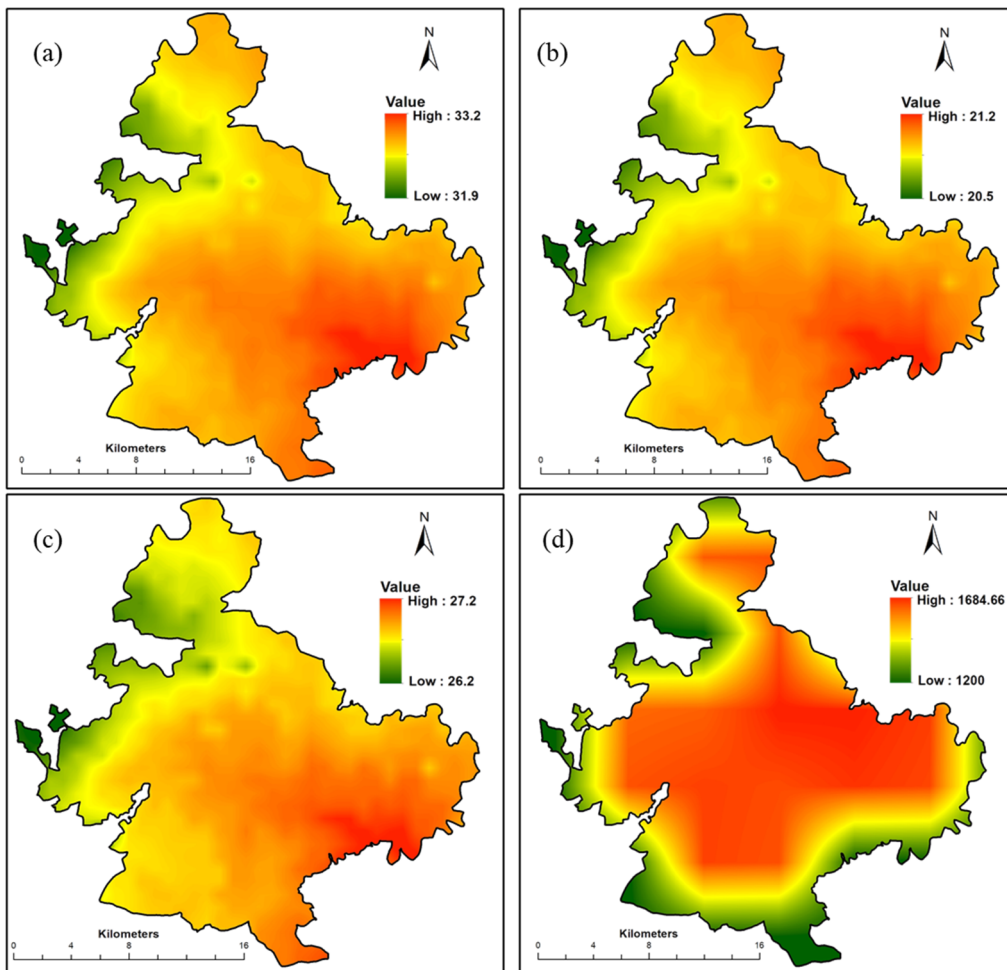

Figure S4. Climate variables: temperature (a) maximum, (b) minimum, (c) average; and (d) rainfall.

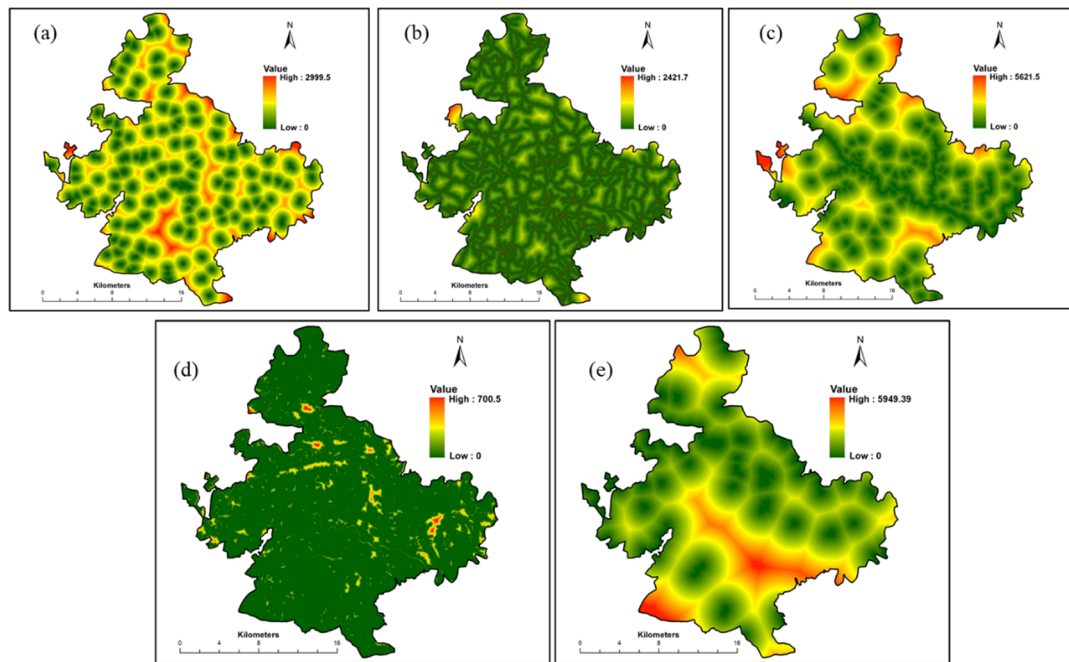

**Figure S5.** Socioeconomic variables: distance from (a) settlement, (b) roads, (c) waterbody, (d) cropland, (e) forest.



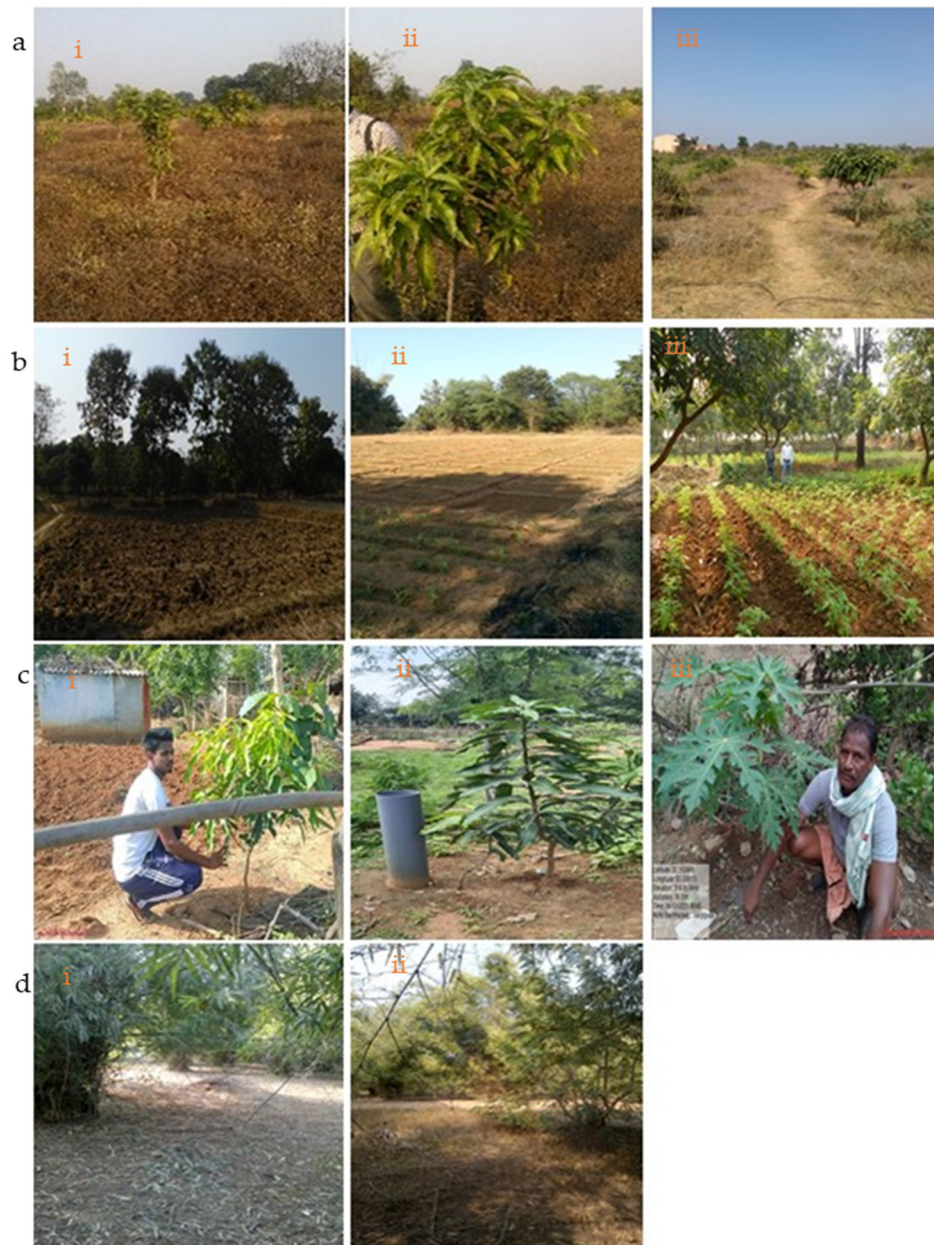

**Figure S6.** Field photographs of various interventions: (a) bund and boundary plantation (b) bund and boundary plantation and intercropping, (c) homegardens, (d) Block/bulk plantations.
